# Supplementary material for: Sight of parasitoid wasps accelerates sexual behavior and upregulates a micropeptide gene in Drosophila
Source: PubMed Central journal article supplement (PMC8079388; doi:10.1038/s41467-021-22712-0), 2021-04-27
Supplement: 41467_2021_22712_MOESM1_ESM.pdf [file 41467_2021_22712_MOESM1_ESM.pdf]

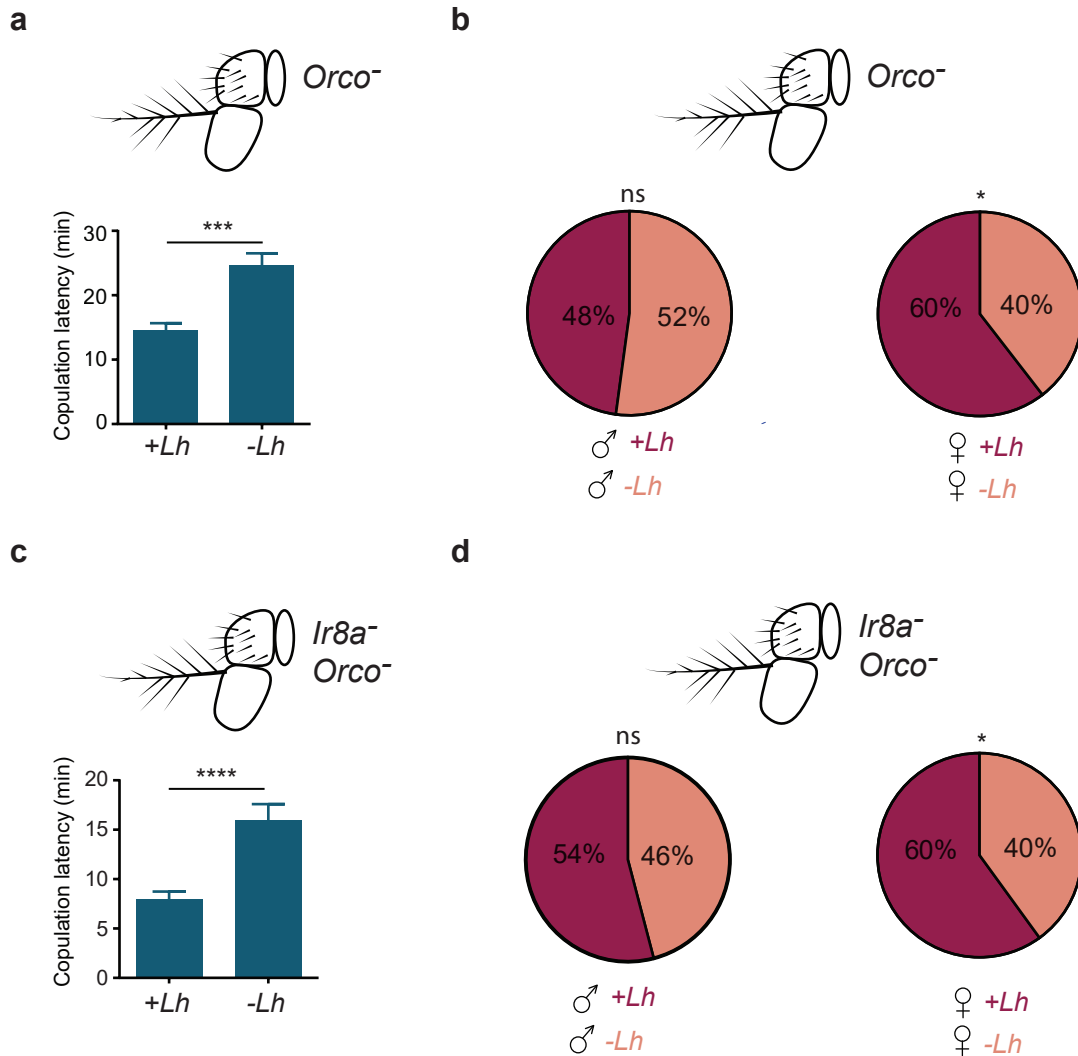

**Supplementary Figure 1. The mating acceleration effect depends on visual cues.**

a) An *Orco<sup>1</sup>* mutant is affected by exposure to *L. heterotoma*.  $p=0.0001$ , two-tailed Mann-Whitney test,  $n=71$  (exposed),  $n=70$  (unexposed). Error bars=SEM.

b) Left, competition experiments between an exposed and unexposed *Orco<sup>1</sup>* male, for an *Orco<sup>1</sup>* female ( $n=117$ ,  $p=0.3559$ , chi-squared test). Right, an exposed and unexposed *Orco<sup>1</sup>* female are placed with an *Orco<sup>1</sup>* male ( $n=124$ )  $p=0.0122$ , chi-squared test.

c) An *Ir8a; Orco<sup>1</sup>* double mutant is affected by exposure to *L. heterotoma*.  $p<0.0001$ , two-tailed Mann-Whitney test,  $n=67$  (exposed),  $n=67$  (unexposed). Error bars=SEM.

d) Left, competition experiments between an exposed and unexposed *IR8a; Orco<sup>1</sup>* male, for an *IR8a; Orco<sup>1</sup>* female ( $n=98$ ,  $p=0.419$ , chi-squared test). Right, an exposed and unexposed *IR8a; Orco<sup>1</sup>* female are both placed with an *IR8a; Orco<sup>1</sup>* male  $p=0.0404$ , chi-squared test,  $n=105$ .

| Gene               |             | FPKM         |               |            | adjusted p-value |                |
|--------------------|-------------|--------------|---------------|------------|------------------|----------------|
| ID                 | name        | control      | Lb exp.       | log2FC     | Cuffdiff         | DEseq2         |
| <b>FBgn0265577</b> | <b>IBIN</b> | <b>100.7</b> | <b>1809.8</b> | <b>4.2</b> | <b>0.0198</b>    | <b>1.9E-10</b> |
| FBgn0043575        | PGRP-SC2    | 3.4          | 57.2          | 4.1        | 0.0198           | 4.7E-09        |
| FBgn0038530        | AttD        | 0.7          | 12.0          | 4.1        | 0.0198           | 1.0E-09        |
| FBgn0262794        | CG43175     | 10.3         | 145.7         | 3.8        | 0.0198           | 3.9E-13        |
| FBgn0004240        | DptA        | 97.9         | 1319.7        | 3.8        | 0.0198           | 3.9E-13        |
| FBgn0000278        | CecB        | 2.3          | 25.5          | 3.5        | 0.0198           | 2.0E-05        |
| FBgn0000279        | CecC        | 4.9          | 37.0          | 2.9        | 0.0198           | 4.3E-03        |
| FBgn0010388        | Dro         | 1502.0       | 10326.5       | 2.8        | 0.0198           | 7.5E-09        |
| FBgn0262881        | CG43236     | 114.8        | 624.3         | 2.4        | 0.0198           | 8.4E-05        |
| FBgn0034407        | DptB        | 106.6        | 570.8         | 2.4        | 0.0198           | 4.7E-03        |

**Supplementary Figure 2. Differentially expressed genes in the heads of female flies that have been in visual contact with *L. boulardi* for 2h, compared to unexposed flies.**

Only significant hits found by both CuffDiff and DESeq2 were considered. Analysis of the *IBIN* gene is highlighted in red. Columns 1-2, gene ID and name; columns 3-4, FPKM (Fragments Per Kilobase of transcript per Million mapped reads) values for control unexposed flies and exposed flies (*Lb exp.*); column 5, log2 fold-change (FC) between exposed and unexposed flies; columns 6-7, p-value adjusted for the false discovery rate calculated with CuffDiff and DESeq2.

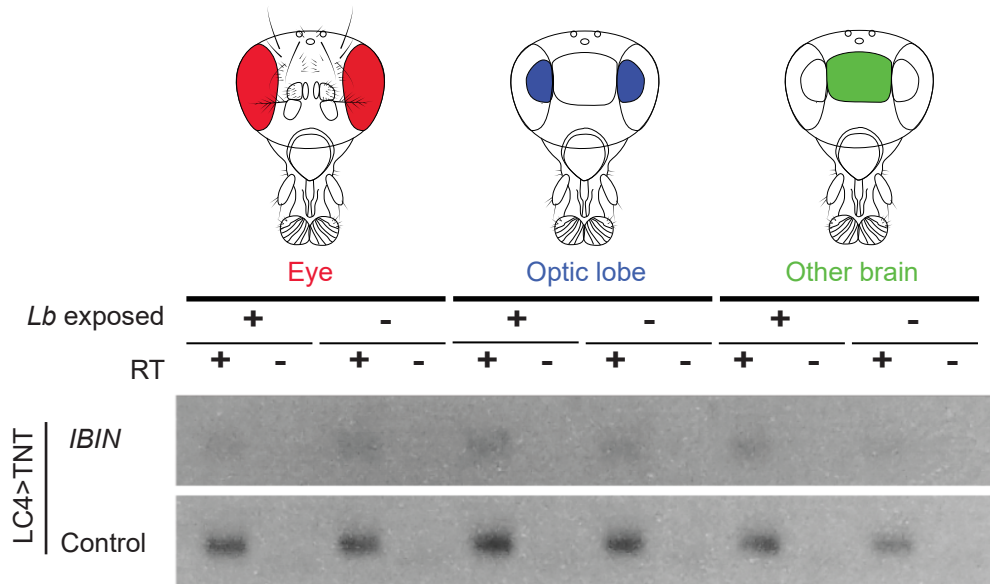

**Supplementary Figure 3. RT-PCR amplification from the indicated tissues.** RT= reverse transcriptase. The control gene is *eIF3c*. n=2.

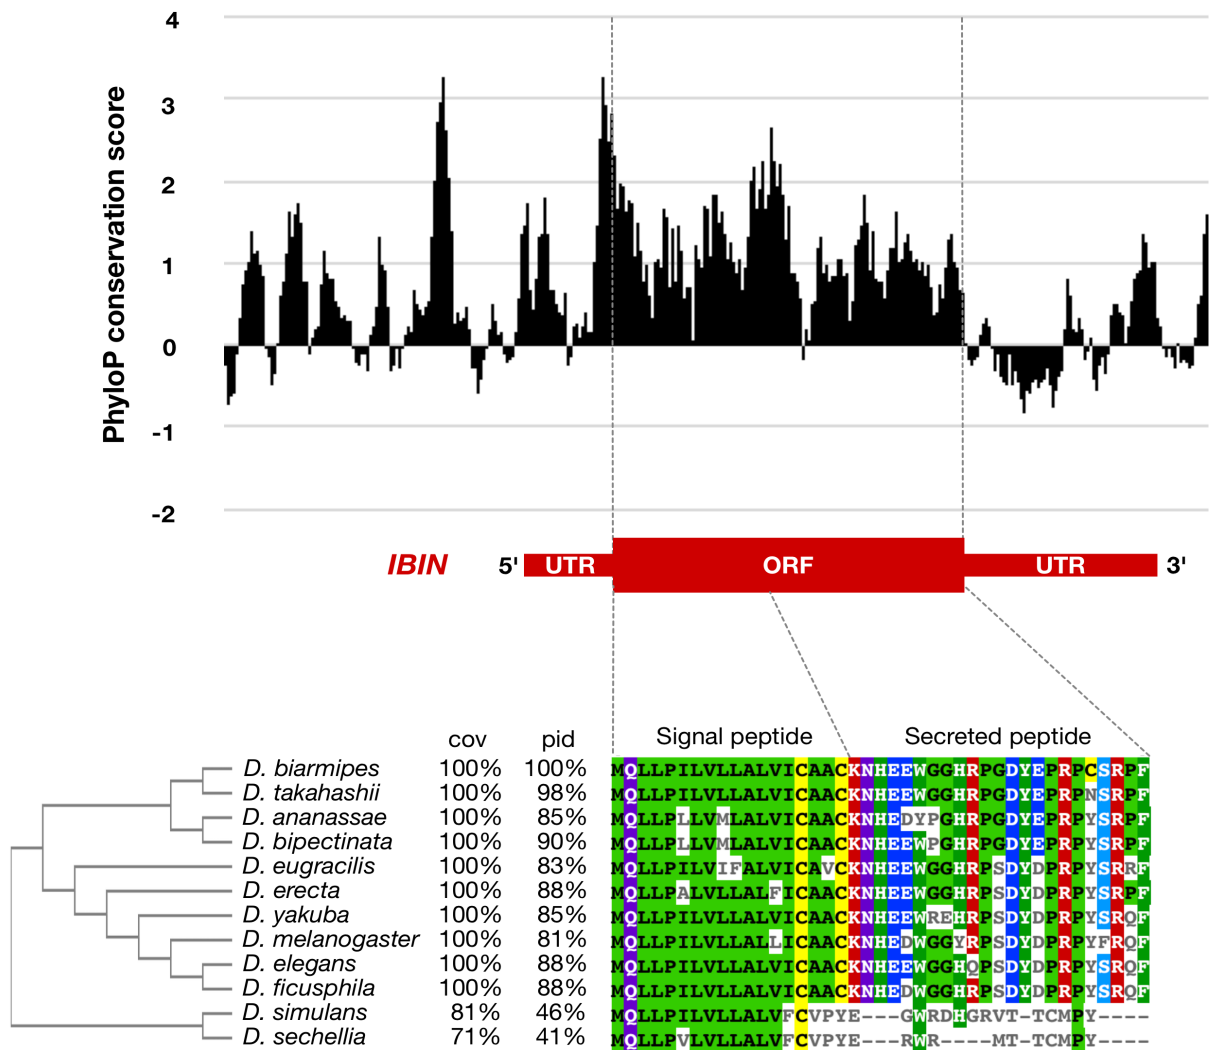

#### Supplementary Figure 4. *IBIN* is conserved in other *Drosophila* species.

The PhyloP conservation score for the locus encoding *IBIN* is based on data from 27 insect species using the University of California Santa Cruz database. The *IBIN* predicted open reading frame (ORF) (average PhyloP score = 1.2) is more conserved than its corresponding untranslated regions (UTRs) (average PhyloP score = 0.5). The *IBIN* ORF is more conserved than 15% of all annotated ORFs in the *Drosophila* genome. Micropeptide alignment was determined using Clustalw Omega<sup>1</sup> and displayed with Mview<sup>2</sup>. Cov = coverage, pid = percentage identity of amino acid sequence relative to the *D. biarmipes* sequence. Conserved amino acids are colored based on their identity. By default, the order and relationship of each species sequence is determined by the alignment.

### Supplementary Table 1. List of primers

|                                           |                    |                                                                          |
|-------------------------------------------|--------------------|--------------------------------------------------------------------------|
| qPCR primers                              | IBIN fwd           | TGCCAATCCTCGTGCTCCTC                                                     |
|                                           | IBIN rev           | CGTGATCATTTAGAACTGCCGAAATA                                               |
|                                           | EIF3c fwd          | GACTGTGGTCAAGGGTCATGTAG                                                  |
|                                           | EIF3c rev          | CTAGCTTCATGGGCTCGGAAAT                                                   |
| primers for the generation of IBIN mutant | guideRNA fwd       | TATATAGGAAAGATATCCGGTGAACTTCG ACCAAGTGACTACGATCCCGTTTTAGAGCTAGAAATAGCAAG |
|                                           | guideRNA rev       | ATTTTAACTTGCTATTTCTAGCTCTAAAACCGAGGACTGGGGAGGATACCGACGTAAATTGAAAATAGGTC  |
|                                           | homology arm 1 fwd | CGAAAGACTGGGCCTTTCGCAGAGCTTCACTCCACAAATGAAC                              |
|                                           | homology arm 1 rev | AGCTGAACGATCGTGGTTCTTGCAGGCG                                             |
|                                           | homology arm 2 fwd | CGAGTTCAAGCCCAGGCCATATTTCCGG                                             |
|                                           | homology arm 2 rev | AGAATAAATTTTGTGTGCGCCCTGGTGGAGTTCCTCACC                                  |

### Supplementary References

1. Sievers F, *et al.* Fast, scalable generation of high-quality protein multiple sequence alignments using Clustal Omega. *Mol Syst Biol* **7**, 539 (2011).
2. Brown NP, Leroy C, Sander C. MView: a web-compatible database search or multiple alignment viewer. *Bioinformatics* **14**, 380-381 (1998).
